# Supplementary material for: Effects of pH on the structure and mechanical properties of dried pH-responsive latex particles
Source: Royal Society of Chemistry journal article supplement (doi:10.1039/c7sm01625e), 2017-01-01
Supplement: c7sm01625e1.pdf [file c7sm01625e1.pdf]

## Supporting Information

# Effects of pH on structure and mechanical property of dried pH-responsive latex particles

Takafumi Sekido<sup>1</sup>, Michael Kapp<sup>2</sup>, Hans-Jürgen Butt<sup>2</sup>, Shin-ichi Yusa<sup>3</sup>  
Yoshinobu Nakamura<sup>4,5</sup>, Syuji Fujii<sup>4\*</sup>

<sup>1</sup>*Division of Applied Chemistry, Graduate School of Engineering  
Osaka Institute of Technology, 5-16-1 Omiya, Asahi-ku  
Osaka, 535-8585, Japan.*

<sup>2</sup>*Physics at Interfaces Group, Max-Planck Institute for Polymer Research,  
Ackermannweg 10, D-55128 Mainz, Germany.*

<sup>3</sup>*Department of Materials Science and Chemistry, Graduate School of  
Engineering, University of Hyogo  
2167 Shosha, Himeji, Hyogo 671-2201*

<sup>4</sup>*Department of Applied Chemistry, Faculty of Engineering  
Osaka Institute of Technology, 5-16-1 Omiya, Asahi-ku  
Osaka 535-8585, Japan.*

<sup>5</sup>*Nanomaterials Microdevices Research Center  
Osaka Institute of Technology, 5-16-1 Omiya, Asahi-ku  
Osaka 535-8585, Japan.*

\* Author to whom correspondence should be addressed ([syuji.fujii@oit.ac.jp](mailto:syuji.fujii@oit.ac.jp))

### Gel permeation chromatography (GPC)

GPC analysis was performed using a refractive index (RI) detector equipped with a Shodex Ohpak SB-G guard column and SB-804 HQ column (bead size = 10  $\mu\text{m}$ , exclusion limit:  $M_n = 1.0 \times 10^6$ , pullulan) working at 40  $^\circ\text{C}$  under a flow rate of 0.6 mL/min. 0.3 M  $\text{Na}_2\text{SO}_4$  aqueous solution containing 0.5 M acetic acid was used as an eluent. The molecular weight of the sample polymer was calibrated with standard poly(2-vinylpyridine) samples of 6 different molecular weights ranging from  $5.70 \times 10^3$  to  $3.16 \times 10^5$  g/mol.

### Fast Fourier transform analysis

A fast Fourier transform (FFT) analysis of the SEM image of the dried particulate materials was conducted using ImageJ software (National Institutes of Health, USA).

**Table S1.** Volume-average ( $D_v$ ) and number-average ( $D_n$ ) diameters and diameter distributions data for the PDEA-PS latex particles used in this study

|         | Media | $D_v / \mu\text{m}$ | $D_n / \mu\text{m}$ | $D_w / D_n$ |
|---------|-------|---------------------|---------------------|-------------|
| PDEA-PS | IPA   | $2.50 \pm 0.63$     | 2.24                | 1.01        |
| PDEA-PS | water | $2.59 \pm 0.77$     | 2.20                | 1.01        |

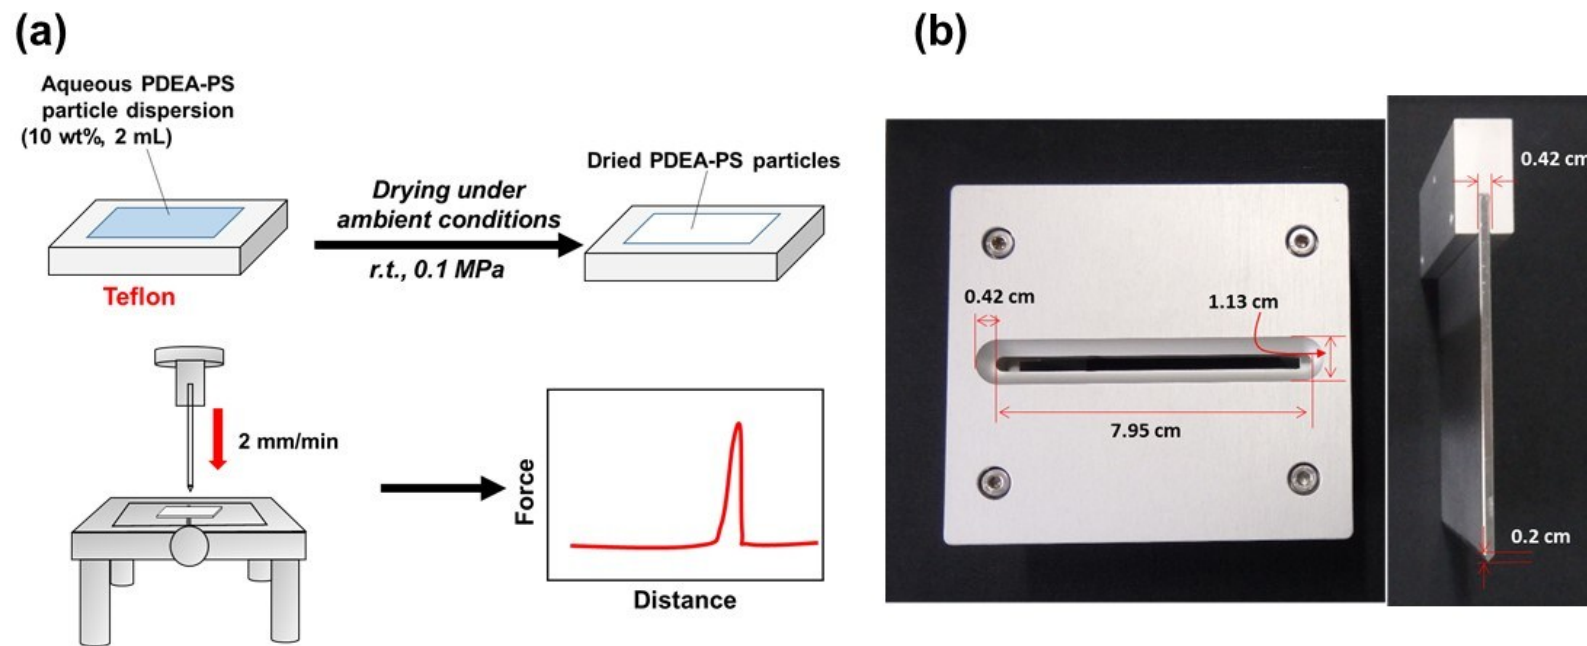

**Figure S1.** (a) Scheme for the fracture test of the samples using the universal testing machine. Rectangular slabs of dried particular matter were placed across a slit and then indented from top with a metal blade with a speed of 2 mm/min until fracture occurred. (b) Images of the slit and the metal blade.

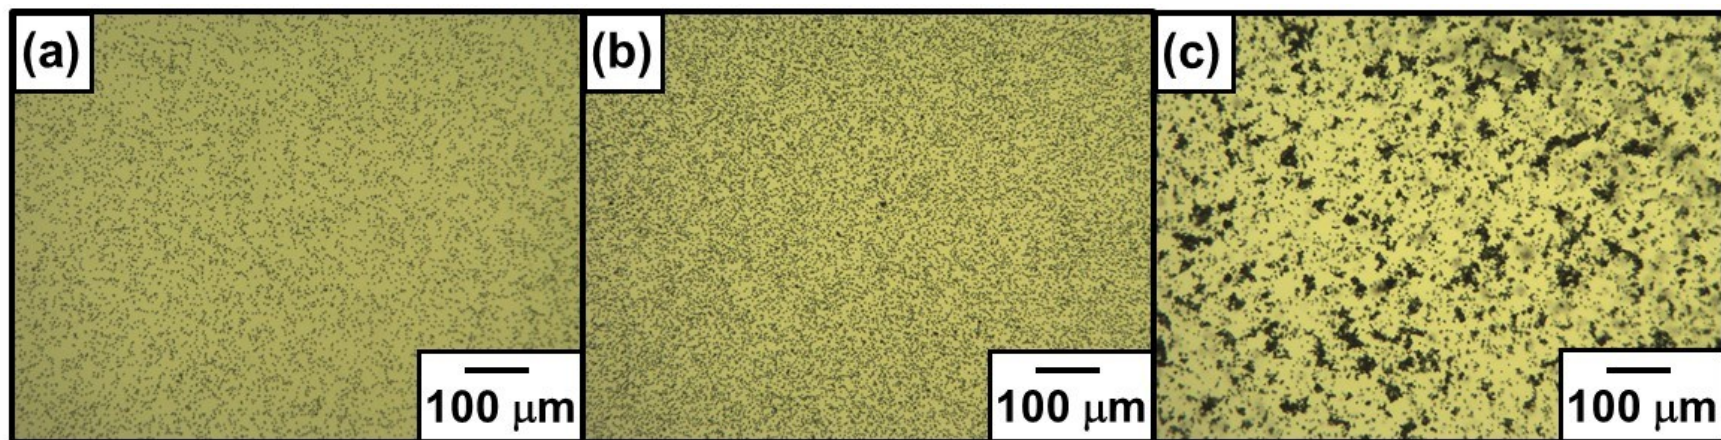

**Figure S2.** Optical microscopy images of aqueous dispersion of PDEA-PS latex particles: (a) pH 3.0 (b) 6.3 and (c)10.0. pH was adjusted using HCl or NH<sub>3</sub> aqueous solution.

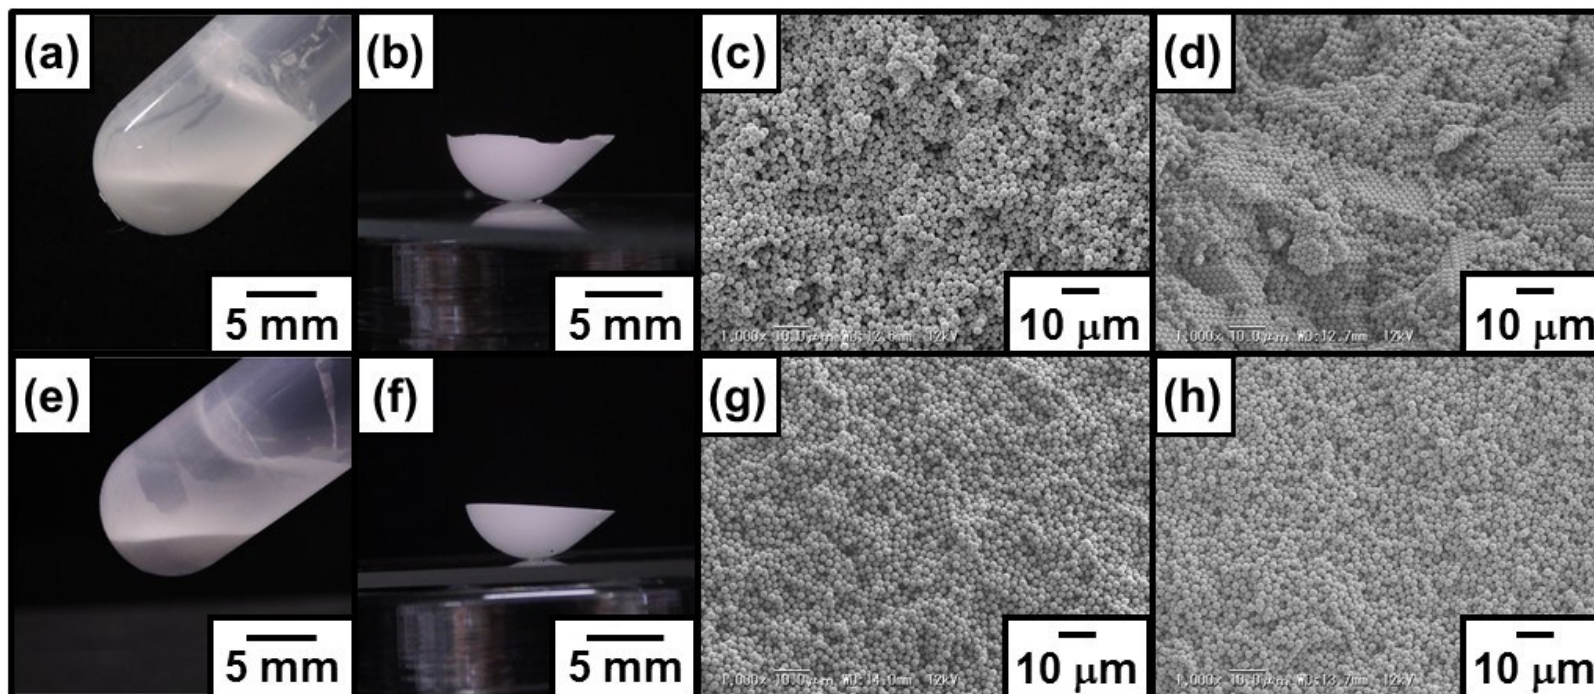

**Figure S3.** (a, b) Digital photographs of PDEA-PS particles sedimented in aqueous media with pH 10.0, and (b, f) digital photographs and (c, d, g, h) SEM images of dried PDEA-PS particulate materials: (a-d) without and (e-h) with centrifugal force (1355 g). Cross section images of the dried particulate materials: (c, g) Upper parts and (d, h) lower parts. The volume of the sediment decreased to approximately 77 % based on that without the application of centrifugal force. We confirmed that the PDEA-PS particles formed randomly-packed structure after the application of centrifugal force in dried particulate materials, which is the reason why the volume of the sediment did not decrease to 44%, where hexagonally close-packed arrangement is attained:  $9.8 \text{ mm} / 22.1 \text{ mm} \times 100\%$ .

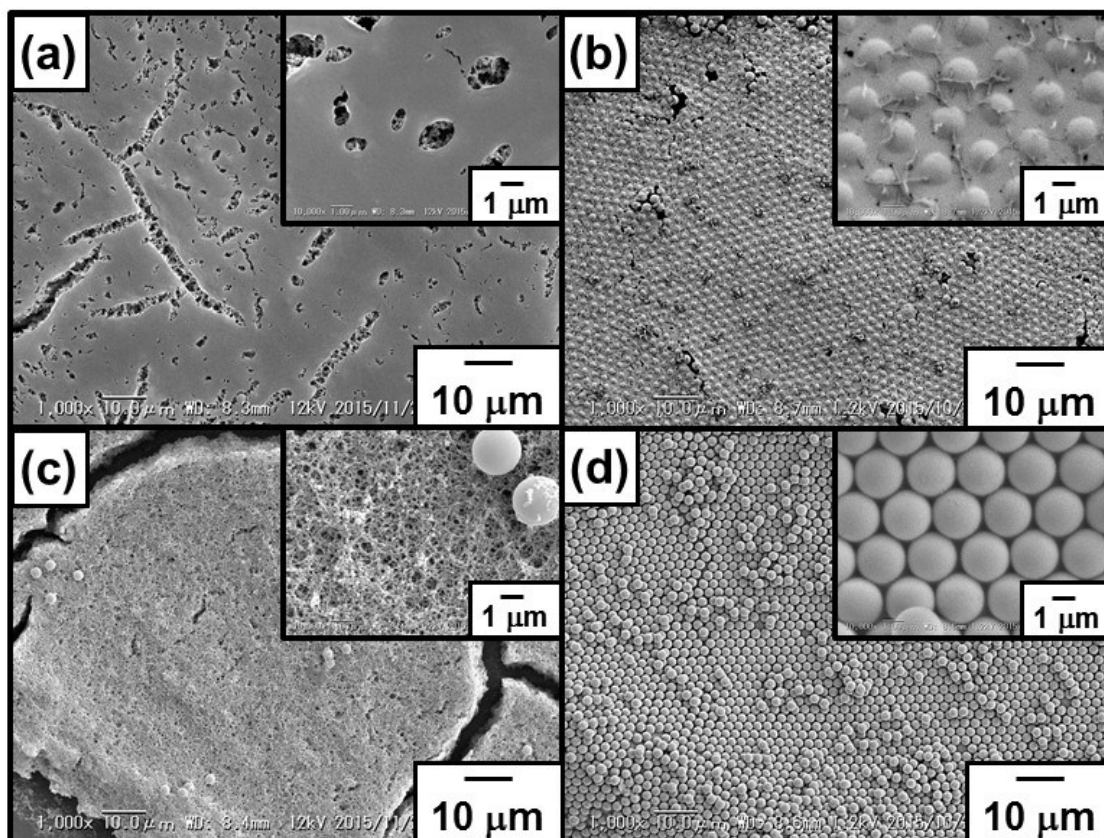

**Figure S4.** SEM images of PDEA-PS particles at the air-water surface (a, c) pH 3.0 and (b, d) pH 10.0. (a, b) air-exposed and (c, d) water-exposed side of the films.

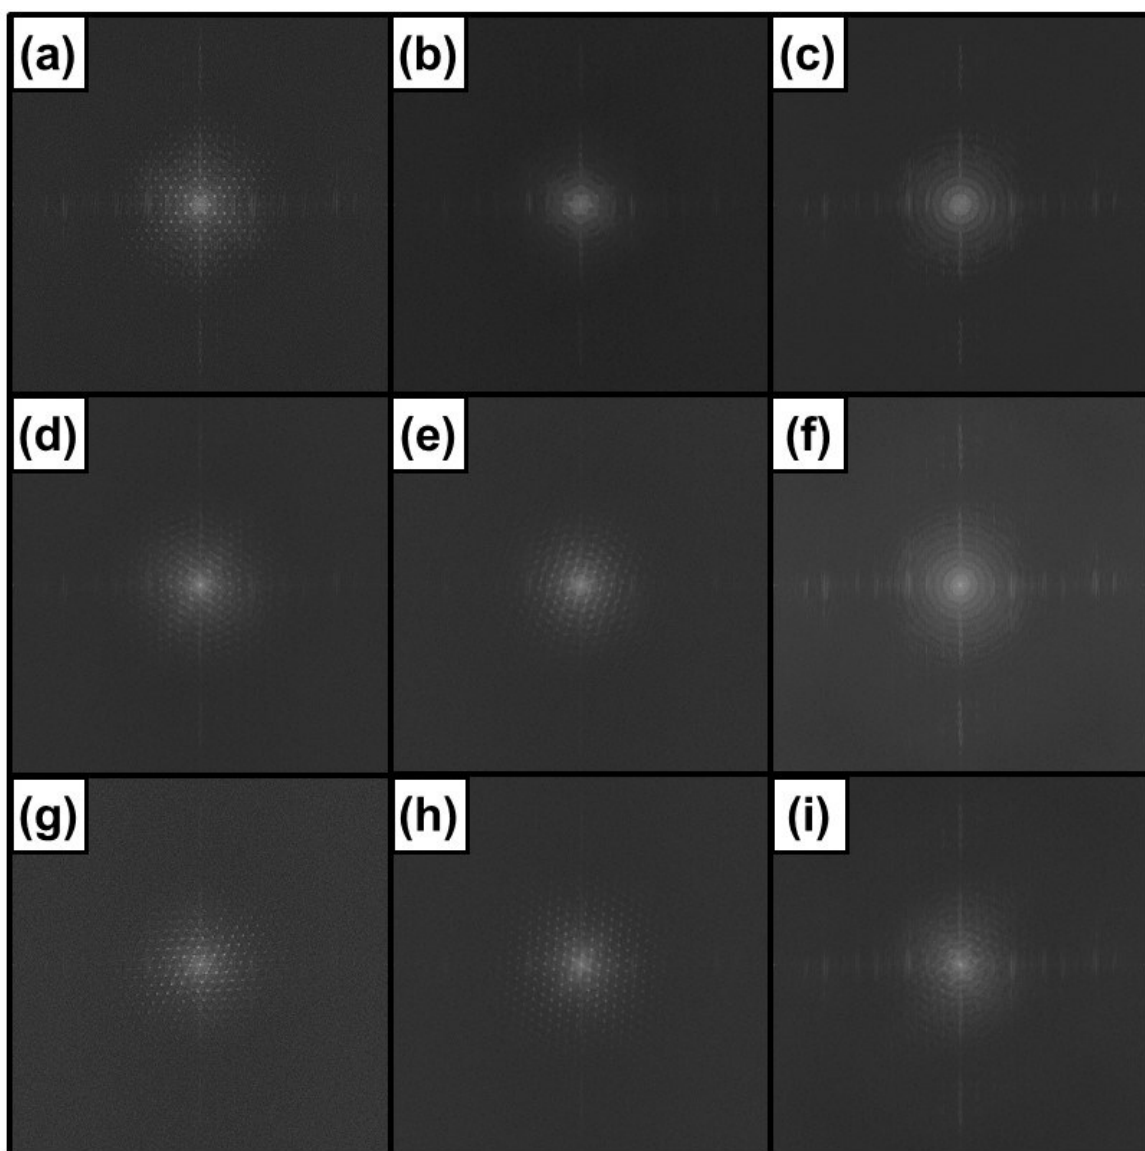

**Figure S5** Fast Fourier transform (FFT) analysis of the SEM images of the dried particulate materials shown in Figures 5d-f and insets of Figures 7d-i: (a-c) surface and (d-i) cross-section of the materials dried at (a,d,g) pH 3.0, (b,e,h) pH 6.3 and (c,f,i) pH 10.0. (d-f) Upper middle parts and (g-i) lower parts of the dried particulate materials.
